# Supplementary material
Source: Springer Nature journal article supplement (https://www.springermedizin.de/resource/supplementary/13045_2009_44_MOESM5_ESM.pdf/9660540)

1 2 3 4 5 6 7 8 9 10 11 12 13 14 15 16 17 18 19 20 21 22 23 24 25

Hp  $\beta$  chain

Hp  $\alpha$ -2 chain

Hp  $\alpha$ -1 chain

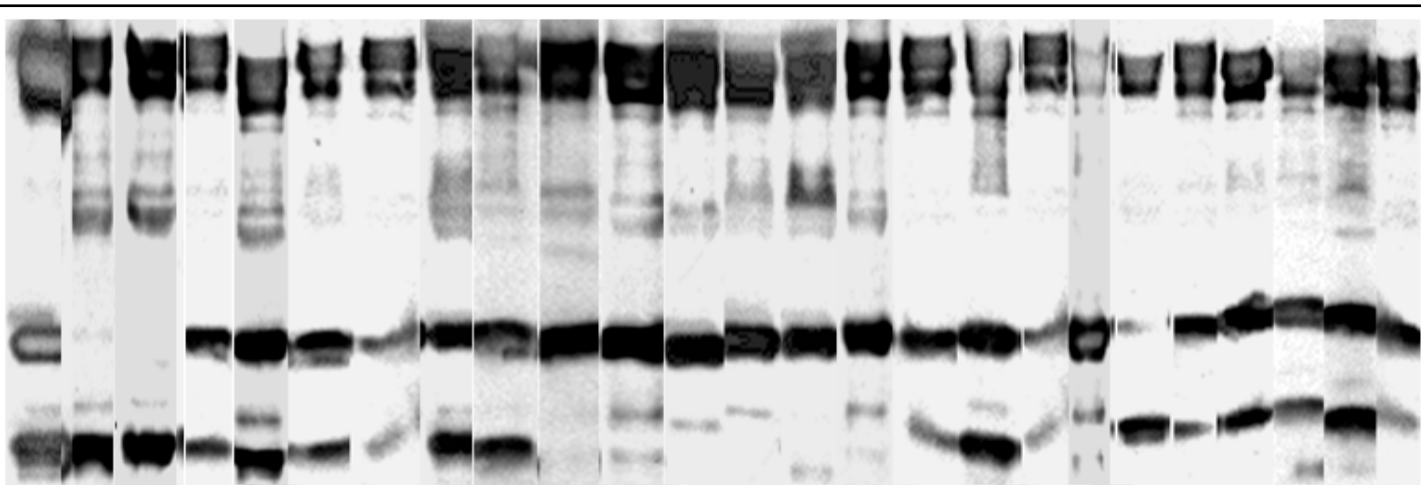

1-1 2-1 2-2 2-1 2-2 1-1 2-1

Supplement: MOESM5 [file 9660540]
